# Supplementary material for: PhySortR: a fast, flexible tool for sorting phylogenetic trees in R
Source: PubMed Central journal article supplement (PMC4868591; doi:10.7717/peerj.2038), 2016-05-12
Supplement: peerj-04-2038-s005.pdf [file peerj-04-2038-s005.pdf]

To simulate a tree of size  $X$ :

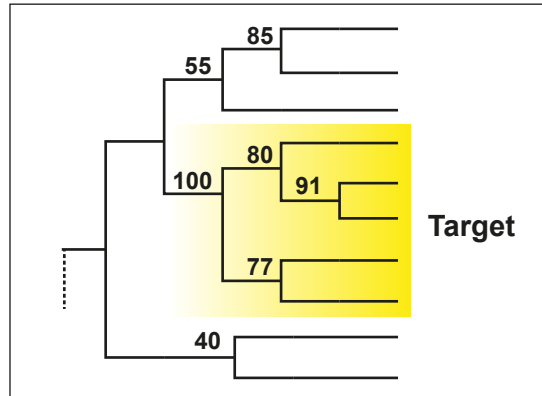

Template tree of size  $1.05X$ , with  $0.2X$  tips contained within a target clade

Label target and non-target leaves at random

Remove  $0.05X$  tip branches at random

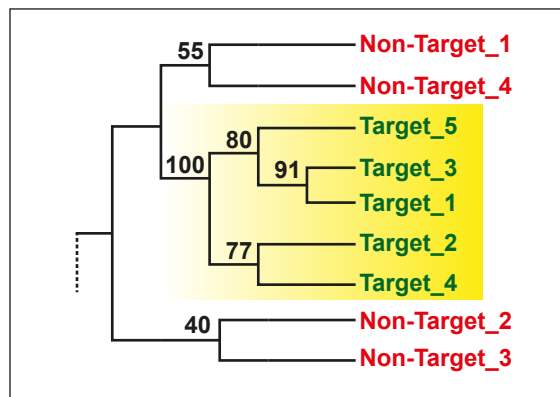

Duplicate tree

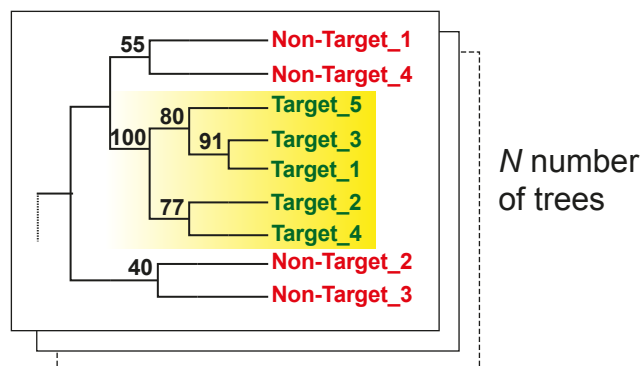

**Supplementary Figure S1.**

Simulation strategy for generating phylogenetic tree sets.
